# Supplementary material for: Cues of control modulate the ascription of object ownership
Source: Springer Nature journal article supplement (doi:10.1007/s00426-017-0871-9), 2017-06-06
Supplement: MOESM1 [file 12343862]

## Sheet: Exp1SpatialProximity
		Girl												Boy												Robot
		Bystander Absent				Bystander Peer				Bystander Senior				Bystander Absent				Bystander Peer				Bystander Senior				Bystander Absent				Bystander Peer				Bystander Senior
Paticipants' age	Paticipants' gender	matching, sentence referring to the Protagonist	matching, sentence referring to the Other	mismatching, sentence referring to the Protagonist	mismatching sentence referring to the Other	matching, sentence referring to the Protagonist	matching, sentence referring to the Other	mismatching, sentence referring to the Protagonist	mismatching sentence referring to the Other	matching, sentence referring to the Protagonist	matching, sentence referring to the Other	mismatching, sentence referring to the Protagonist	mismatching sentence referring to the Other	matching, sentence referring to the Protagonist	matching, sentence referring to the Other	mismatching, sentence referring to the Protagonist	mismatching sentence referring to the Other	matching, sentence referring to the Protagonist	matching, sentence referring to the Other	mismatching, sentence referring to the Protagonist	mismatching sentence referring to the Other	matching, sentence referring to the Protagonist	matching, sentence referring to the Other	mismatching, sentence referring to the Protagonist	mismatching sentence referring to the Other	matching, sentence referring to the Protagonist	matching, sentence referring to the Other	mismatching, sentence referring to the Protagonist	mismatching sentence referring to the Other	matching, sentence referring to the Protagonist	matching, sentence referring to the Other	mismatching, sentence referring to the Protagonist	mismatching sentence referring to the Other	matching, sentence referring to the Protagonist	matching, sentence referring to the Other	mismatching, sentence referring to the Protagonist	mismatching sentence referring to the Other
children	f	1913.75	1389.75	1938.75	1768.75	2217.25	1774.5	1532.25	1561.75	1618	1878.25	2064.25	1498.25	1571.5	1591	1598	1303.5	1561.25	1559.25	1667.75	1362.5	1460.5	1574	1662.25	1652	1825.25	1521	1618	1555	1783.75	1722.75	1566	1605.25	1432	2102.75	1330	1762.75
children	f	1452.75	1136	1311.5	1567.25	1361.75	1600.5	1665	1795.5	1456.5	1639.75	1353	2051.5	1768.75	1439.5	1876	1551.75	1657.5	1745	1788.25	1704	1638.75	1687.25	2255	1297	1502	1855.5	2296.5	1652.75	1760.75	1516.5	1323.5	1770	1672	1407	1601.5	1476.25
children	m	952.25	1363.75	1228	899.25	1494.5	978.5	1050.5	1202.5	1195	1297.75	1197.25	968	1022.25	963.25	1176.5	1121.25	617.5	986.75	1118	1128	1547	994	1568	1090	1140.25	989.25	1023.5	1045.5	1299.5	1189.5	1262.75	1284	292	1810.5	992	758
children	f	2024.25	1935.25	1603.5	1330.75	1445.5	1600.5	1776.75	1554.75	1666.75	1995.75	1598.25	2304.75	1200.25	1625.75	1654.5	1727	1381.25	1527.5	1415.5	1818	1288.25	1733.5	1537	2036.75	1149.75	1969.25	1802	1482.5	1693	2149	2081.75	1723	1742.5	1684	1734.5	1748.25
children	f	1289.5	1322.5	1147.5	1312.5	1304.75	1384.25	1352.5	1219	1344	1480.75	1427.5	1294.5	1577	1342	1083.75	1439.75	1392.25	1469	1376.5	1216	1345	1068.5	1516.5	1621.5	1552.75	1129.75	1227.5	1508.5	1623.25	1353.5	1597	1227	1478.5	1910.75	1337.5	1350.75
children	m	1058	1289.25	927.5	1257	1167	1375	1040.25	1026.25	1011	1331.25	1431.75	1051.75	1267.75	1334.5	1582	1297.5	1229.5	1420.75	1110	1367.75	1363.5	1885.25	1248.5	1111	1521.75	1217.25	1105.25	1302.5	1570.25	1164.75	1293.25	1371.75	1449.75	1306.5	1192.25	1206
children	m	1407.75	969.75	1185.5	1084.5	1415	1034.75	1318.5	1107	939.75	749	1222	1233.75	1388.75	1208	1096.5	1281	960.25	1001	1387.5	1072.25	1271.75	1217.5	806.75	1066.5	1186	1121	1074	854	1295	1563.25	940	1020.75	979.5	1608.75	951	1166.5
children	m	368	1569.5	460.5	1111.25	1608.25	1380.5	1002.25	1292	1463.25	1267.75	1113.5	1234	1563.5	1750		1216.75	1490	1076.25	1523.75	1688.5	1468	1444.5	994.75	1495.5	1199.75	1132.5	541	728.5	1160.75	1669	395	650.5	952.75	864	1151.25	1336.5
children	m	1095.5	1186.5	1200.75	1479.5	1399.25	1072.5	1251.5	1486.25	1206.75	1309.5	1084.5	960.25	986.5	1015	1097	1104.5	1105.5	1397.5	1325	1117.5	1268.5	1091	1474.75	1090.75	1030	1363.75	1176.25	1225.5	1274.5	1136.25	1577.25	1264	981.25	1188	1564.5	1275.75
children	f	1052.75	1371.75	1353.5	1174.25	1070	1215.25	1212	1013.5	1478.75	1354.75	1032.5	1289.75	912.5	1212.25	1056.5	1018.5	996.75	1222	1502.5	1115.25	1140.75	1277.25	1182.25	940	1003.25	1211.75	1115	1360.25	1351.5	1037.5	1526.25	1131.25	1422	1460.25	1165.75	1276.25
children	f	1489.5	1770.5	1417.25	1429	1596.5	1301.75	1022.75	1229	1131.5	1018	1281.75	1618.5	1446.25	1366	1378.5	1356.5	1345.25	1530	1364.75	1302.75	1137.5	1416	1191.75	1522.25	1368	1321.25	1652	1942	1549.5	1502.75	1510.5	1183.25	1493.75	1266.5	1625	631
children	m	874.5	605	683	644	862.5	657.5	852	845.5	908	656.75	520	779.75	797.25	582.75	1052	662.25	734.25	715.25	1086	754.5	667.75	511	749	828.25	706.25	635.75	703.25	720.5	789.25	965.5	687	855.25	669	568.5	605.25	677.5
children	f	1133.75	1185.5	1186.25	1028.75	1195.75	1165.75	1394	1226.25	1021.25	578	1017	934	846.5	926	934.5	898	1344.5	741.25	909.5	789	891.75		1000.5	1247.75	1210.5	1077	1085.75	1315.25	857.5	1174	892.5	1067.75	845	900.75	786	1249.75
adults	m	807.75	831.75	796.75	876.25	874.5	814.75	1229.75	796	813	1012.25	1010	1237.25	872	825.25	687.75	1408.5	1014.25	870.75	832.25	1052.75	812.25	1411	791.75	1317.25	810	832.5	901	701	832	1496	899.75	880	802.5	891	826	959.5
adults	f	1527.25	1444.75	1355.75	1508.5	1006.75	1491.75	1560.25	1470.5	1313.75	1715	1349.75	1484	1236.25	1569.5	1392.25	1535.5	1373	1399	1573	1242	1341.75	1400.75	1456.75	1529	1560.25	1486.5	1524.5	1474	1621.25	1711.5	1361	1445.5	1357	1350.25	1296.25	1429.75
adults	m	1196.25	1080.75	964	1104.25	813	1130.25	1347	1092	1299.25	934.5	1187.5	1084.5	986	1019.25	1033.5	1645	980.25	1035.5	1043.25	1280.5	1034.25	1017	722.5	890.25	1172.5	1130	1149	1255.25	1277.5	993.25	1378.5	1348.75	1196.75	1145.25	1319.25	1264
adults	m	1214	1538	1623.75	1877.25	1152.5	1454.75	1104.25	1130	1148.75	1141.5	1507.5	1514.5	1490.25	1142.5	1443.5	1470.75	1176	1753.5	1313.5	1084.5	1008.75	950.75	903.75	1496.5	1197.5	1503.5	1528.5	1347.75	1621	1573	1396.25	1167.5	1289.75	1488.25	1565.75	1013
adults	m	848.25	931.25	1280.25	882.75	823.25	914.75	1099.5	829	766	909.75	997.25	1044.75	1134.5	897	1088	1131	1257.25	1097.5	1100	1128	1055.25	1236.5	734.5	1342.25	967.25	866.75	1610.25	1005	1111.5	1151.75	1064.75	714.75	1116.5	1042.75	973	1159.75
adults	m	1836.25	1796	1702.75	1556.75	1634.5	1567.25	1628.75	1760	1678.75	1526	1710	1634	1618.5	1752.5	1555.75	1682	1558.25	1554	1561.25	1856.25	1599.25	1671.75	1517.5	1655.75	1524.75	1619.25	1595.25	1530	1891	1669	1784.25	1520.75	1679.75	1587	1394	1716
adults	f	1519.25	1429.25	1181	1749.5	2301.25	1782.5	1396.5	1127.5	1869	1694	2057.25	1768.5	1360.5	1541.75	2003.25	1846	1288.5	1607.5	1622.5	1603.75	1461.5	1109	1526.5	1307	1371.75	1712	2419.75	2024.75	2222	1225	1673	1307.5	2048.75	1979	1991.25	1741.5
adults	f	1519.25	1429.25	1181	1749.5	2301.25	1782.5	1396.5	1127.5	1869	1694	2057.25	1768.5	1360.5	1541.75	2003.25	1724.25	1288.5	1607.5	1622.5	1603.75	1461.5	1109	1526.5	1307	1371.75	1712	2419.75	2024.75	2222	1225	1673	1307.5	2048.75	1979	1991.25	1741.5
adults	m	985	1244.25	1058.75	1112.25	1062	1249.5	1149.25	1202	1566.25	973.25	1233.5	1096.5	1143	1001	1166.75	1146.25	1072.5	1290.25	1326.75	1264.5	942.5	1185	1070.75	1166.25	1161.5	946.5	1290	1213.75	1585.25	1141.5	1261.5	1148.75	1366.5	1011.75	1092	1090.25
adults	m	1588.25	1513.5	1556.25	1516.75	1784.75	1818.5	1563	1646.75	1924.5	1388	1410.25	1672.25	1647	1867.5	1393	1670	1642.5	989.5	1646.5	1278.5	1817.5	1631.25	1482	1265.25	1930.75	1385	1877.25	1490.25	1511.75	1527.75	1634.75	1660.5	1609	1782.75	1982.5	1645
adults	m	845.25	788.25	1312.25	878.25	979.5	1073	1192	914.25	911	836.75	791	1095.25	919	1169	1164	887.75	1150.75	1336.25	846	951.25	711.75	1037.75	905	882.5	1199.25	858.25	1015	882.75	1091.5	1376.75	1183.25	972.75	567	829.25	1026.25	943.25
adults	f	1062.25	1240.5	1130.5	1104.25	1245.5	977	1246.75	1043.25	1157.25	1037.75	1134.5	1318.5	1264	939	1421.75	1057.25	959.25	1039.75	1318.5	1226.5	910.5	1172.75	962.5	987.25	1408.75	1251	1262.75	1259	1176.75	1226	1172.75	1244.75	1051	1030	989	1161.75
Participants' gender		Protagonist		Spatial proximity X Bystander				Participants' gender X Protagonist			Protagonist X Spatial proximity				Participants' age X Protagonist X Bystander							Gender, Protagonist and Bystander
f	1482.78	Girl	1316.23		Bystander Absent	Bystander Peer	Bystander Senior		f	m		Girl	Boy	Robot		Children			Adults				f			m
m	1164.77	Boy	1290.76	matching, sentence referring to the Protagonist	1284.52	1370.56	1294.72	Girl	1480.58	1151.88	matching, sentence referring to the Protagonist	1343.75	1232.45	1373.6		Girl	Boy	Robot	Girl	Boy	Robot		Girl	Boy	Robot	Girl	Boy	Robot
		Robot	1364.33	matching, sentence referring to the Other	1289.93	1332.97	1338.5	Boy	1419.52	1162	matching, sentence referring to the Other	1307.65	1282.45	1371.3	Bystander Absent	1274.42	1261.27	1291.48	1303.24	1369.55	1438.5	Bystander Absent	1431.26	1454	1584.3	1146.41	1176.82	1145.68
				mismatching, sentence referring to the Protagonist	1371.41	1352.84	1325.67	Robot	1548.24	1180.42	mismatching, sentence referring to the Protagonist	1304.64	1343.07	1402.22	Bystander Peer	1291.07	1270.47	1371.94	1333.51	1314	1398.38	Bystander Peer	1451.94	1428.83	1521.05	1172.64	1155.63	1249.27
				mismatching sentence referring to the Other	1346.45	1263.2	1314.5				mismatching sentence referring to the Other	1308.87	1305.08	1310.21	Bystander Senior	1294.62	1304.22	1283.38	1400.49	1225.07	1402.3	Bystander Senior	1558.53	1375.74	1539.38	1136.59	1153.55	1146.3
Riass. tutti gli Effetti; dis.: (nuovo.sta)
1-VAR1, 2-NUOVA2, 3-GBR, 4-APS, 5-MPMOMI
	gdl	MS	gdl	MS
	Effetto	Effetto	Errore	Errore	F	p-level
1	1	704601	19	2023328	0.348239	0.562065
2	1	19635932	19	2023328	9.70477	0.005698
3	2	361340	38	47116	7.66916	0.001593
4	2	8721	38	40238	0.216731	0.806135
5	3	64472	57	42296	1.5243	0.217999
12	1	995508	19	2023328	0.492015	0.491533
13	2	86842	38	47116	1.84314	0.172194
23	2	202389	38	47116	4.29554	0.020803
14	2	59638	38	40238	1.48212	0.239991
24	2	93224	38	40238	2.3168	0.112357
34	4	80532	76	35310	2.28072	0.068294
15	3	41626	57	42296	0.984166	0.406739
25	3	12029	57	42296	0.284395	0.836457
35	6	96443	114	40630	2.37368	0.033775
45	6	109482	114	43551	2.51389	0.025376
123	2	10989	38	47116	0.233243	0.793086
124	2	2676	38	40238	0.066508	0.935764
134	4	129091	76	35310	3.65596	0.00889
234	4	114178	76	35310	3.2336	0.016632
125	3	30602	57	42296	0.723522	0.542113
135	6	48701	114	40630	1.19865	0.312136
235	6	70005	114	40630	1.72299	0.121854
145	6	66490	114	43551	1.52673	0.175633
245	6	47359	114	43551	1.08744	0.374206
345	12	82772	228	39164	2.11346	0.01701
1234	4	44016	76	35310	1.24658	0.298522
1235	6	67696	114	40630	1.66615	0.135645
1245	6	37216	114	43551	0.854538	0.530745
1345	12	24920	228	39164	0.636286	0.810075
2345	12	61393	228	39164	1.56757	0.102233
12345	12	60385	228	39164	1.54185	0.110468

## Sheet: Exp2TemporalPriority
		Gender correspondence										No gender correspondence
		MATCHING sentence – finder					MISATCHING sentence – finder					MATCHING sentence – finder					MISATCHING sentence – finder
kind of Co-presence	Participants' gender	absent	same age female	older female	same age male	older male	absent	same age female	older female	same age male	older male	absent	same age female	older female	same age male	older male	absent	same age female	older female	same age male	older male
No co-presence	M	1016.83	1054.25	883.667	1002.75	906	1189.25	1019.33	1025.33	732.333	1067.5	1118.67	880.5	924.25	903	916.333	923.167	1198	1045.25	883.167	1100.25
No co-presence	M	789.5	605.5	615.25	613	634.667	706.833	674.333	628.333	628.833	814.167	589.833	552.167	628.417	874.5	506.083	687.5	736.667	902.833	739	765.333
No co-presence	M	897.5	1049.83	951.167	920.5	998	1019.83	873.333	968.167	954.667	898.333	825.5	935.667	858.167	866.167	965.917	874.5	957.667	922.667	924.333	802.167
No co-presence	M	1131.83	932.333	1034.5	900.333	845.167	1101.17	892.083	830.5	1008.75	975.667	846.833	1105.33	1015	836.417	926.167	938.417	1194.33	913.333	1020.83	957.833
No co-presence	M	977.25	901.917	1025.75	1157.17	1006.25	1019.5	913.583	996.667	1105.33	1011.83	1079	1120.83	1037.58	1080.17	934.667	1121	969	960.333	1108.83	963
No co-presence	F	690	750.667	677.167	805.333	859.667	787.583	799.75	783.917	627.75	744.917	779.833	727.333	715.5	889	1163.08	836.833	710.833	646.25	612	736.833
No co-presence	F	1054.33	1080	1039.67	1112.17	922.167	1149.67	1119.17	905	1070.17	1076.33	1121	1118.67	965.583	1043.83	1189.33	961.833	1134.83	1014.33	1086.83	957
No co-presence	F	1013.5	896	781.833	880.167	905.667	862.5	945.667	812.833	844.833	935.667	772.917	799.667	859	840.583	725.667	760.5	949.333	760.167	864.167	797.667
No co-presence	F	1219.5	1224.83	1107.25	1119.33	1318.5	1084.08	1116.83	1109	1237.83	1288.83	1230.75	1106.67	1175.17	1219.33	1137.5	1127.33	1118.67	1130.17	1300.58	1082.67
No co-presence	F	794.5	883.833	917	949.667	879.667	921.167	842.583	865.25	997.5	858.833	957.833	962.583	931.5	959.833	896.333	954.833	1291.33	924	909.5	837.167
Partial co-presence	M	1102.83	947.333	1036	1268.5	1239.33	1052.5	1309.5	1132.33	1261.42	1078.58	1201	1099	1013.42	1062.67	1266.67	1185.42	1227.5	1167.17	1114.5	1186.33
Partial co-presence	M	656.333	764.167	764.5	777.167	906.667	772.5	1229.33	998.417	889.667	853.667	885.417	612.917	741.667	751.167	774	768.667	739	1035.83	918.833	862.917
Partial co-presence	M	705.167	748.167	815.833	717.5	780.833	838.833	741.167	832.5	921.5	752.083	923	855.917	815.5	852.333	813.167	762.833	801.333	707.833	725.333	746
Partial co-presence	M	827.833	958.667	1119.5	1011.5	787.833	764.25	882	871.917	814.75	831.333	1120.5	984.167	1234.17	1038.33	989.833	868.667	868.917	845	1183.75	921.167
Partial co-presence	F	882.667	882.5	888.667	852.75	857.333	685.833	773	1037.83	973.667	885.5	624.667	895.333	818.833	771.667	891.833	980.5	647.667	840.167	791.75	761.333
Partial co-presence	F	1020.33	1017.5	1087.33	1073.83	1097.83	1205.17	1051.67	995.167	1135.33	997.667	1137.5	956.333	1184.83	957.667	1235.83	1186.83	1290.5	1220	1175.5	1132.17
Partial co-presence	F	894.167	834	814.333	761.333	812.833	981.5	751.833	793	833	826.667	746.667	619.167	791.333	949.167	802.5	1094.67	805.5	1036.83	643.5	970.667
Partial co-presence	F	1185.67	1392.5	1236.17	1246.83	1378	1300	1226.5	1239.33	1298.67	1221	1320.33	1321.67	1332.58	1207.17	1527.33	1319.5	1333	1426.17	1503	1485.83
Full co-presence	M	676.833	698.833	843.5	778.083	748.167	671.5	919	601.833	842.167	659.667	743.167	757.833	698.5	709	706.167	743	734.833	648.167	691.5	533.167
Full co-presence	M	1084.33	1090.67	1122.67	959.667	942.333	1047.5	1050.33	1049.17	1138.67	976.167	1195.5	1122.83	1073.08	1073	1096.5	1160.5	990.167	1027	977.333	968.5
Full co-presence	M	1203.83	1064	1051	1012.42	984.667	1092.67	1157.67	1182.83	1170.17	1127	1111.33	1108.67	1200.17	1072.67	1135.17	1261.5	1079.5	1063.83	1062.33	1125.17
Full co-presence	M	561	658.333	620.167	613.75	604.5	657.5	707.667	631.333	643.667	598.833	664	683.167	645.667	674.667	617.583	595.167	619	618.667	617.833	618.333
Full co-presence	F	858.667	1050	891.667	768.5	854.5	862.833	993.167	1109.67	1037	1045.67	983	902.5	1025.83	1176.67	965.5	953	821.333	1085.17	1031.17	1108.83
Full co-presence	F	777.333	608.5	603.833	706.5	778.5	738.167	769.167	852.667	633.5	823.667	611.5	657.667	973.333	682	775.167	689.5	790.5	773.667	845.333	716.5
Full co-presence	F	1021.5	1049	871.167	1041.5	858.417	1013	945.5	1052.83	1009.75	1073.5	1057.92	1083.67	866.333	876.667	1004.83	1058.83	1291	920.833	944.583	929.167
Full co-presence	F	891.5	854	819.5	781.833	870.167	953.167	777.167	960.667	944.333	914.167	813.167	873.5	781.167	876.667	799.333	747.083	918.667	833.167	796	841.167
Co-presence X Gender correspondence (Finder – Participant) X Temporal Priority,							Temporal priority X Co-presence X Gender correspondence between finder and participant X participants' Gender
	No co-presence		Partial co-presence		Full co-presence			no co-presence				partial presence				full co-presence
	Gender correspondence	No Gender correspondence	Gender correspondence	No Gender correspondence	Gender correspondence	No Gender correspondence		m		f		m		f		m		f
MATCHING sentence – finder	934.667	932.313	953.806	978.182	856.883	896.878		Gender correspondence	No Gender correspondence	Gender correspondence	No Gender correspondence	Gender correspondence	No Gender correspondence	Gender correspondence	No Gender correspondence	Gender correspondence	No Gender correspondence	Gender correspondence	No Gender correspondence
MISMATCHING sentence – finder	936.866	942.301	976.015	1007.05	910.874	880.775	MATCHING sentence – finder	914.037	893.087	955.297	971.539	896.783	951.743	1010.83	1004.62	865.938	904.434	847.83	889.321
							MISMATCHING sentence – finder	922.226	944.376	951.506	940.226	941.412	931.85	1010.62	1082.26	896.268	856.775	925.481	904.775
Riass. tutti gli Effetti; dis.: (nuovo.sta)
1-VAR1, 2-NUOVA2, 3-GENDCNO, 4-MATCHMI, 5-AFFOM
	gdl	MS	gdl	MS
	Effetto	Effetto	Errore	Errore	F	p-level
1	2	342566	20	636465	0.538233	0.592
2	1	295578	20	636465	0.464406	0.503387
3	1	16704.3	20	14818.1	1.12729	0.301008
4	1	36543.5	20	14611.4	2.50103	0.129458
5	4	815.4	80	8156.9	0.099967	0.982163
12	2	78101.5	20	636465	0.122711	0.88518
13	2	8543.5	20	14818.1	0.576555	0.570897
23	1	1854.5	20	14818.1	0.125153	0.727214
14	2	4446.9	20	14611.4	0.304343	0.740964
24	1	4194.1	20	14611.4	0.287043	0.59803
34	1	11057.6	20	4198.8	2.63347	0.120291
15	8	12614.6	80	8156.9	1.5465	0.154552
25	4	10881.2	80	8156.9	1.33399	0.264562
35	4	1122	80	8780.5	0.12778	0.971943
45	4	6247.3	80	9297	0.671968	0.61334
123	2	284.6	20	14818.1	0.019208	0.980994
124	2	31916.8	20	14611.4	2.18438	0.138664
134	2	20730.7	20	4198.8	4.93723	0.018084
234	1	6841.7	20	4198.8	1.62942	0.216407
125	8	8438.5	80	8156.9	1.03452	0.417482
135	8	16122.8	80	8780.5	1.83621	0.082293
235	4	3770	80	8780.5	0.429358	0.787022
145	8	5604.8	80	9297	0.602862	0.772839
245	4	6939.8	80	9297	0.746454	0.563237
345	4	5574.2	80	8240.2	0.67647	0.610249
1234	2	31562.4	20	4198.8	7.51692	0.003676
1235	8	10492.8	80	8780.5	1.19501	0.312627
1245	8	15269.2	80	9297	1.64238	0.125945
1345	8	6809.3	80	8240.2	0.826349	0.58188
2345	4	15645.1	80	8240.2	1.89863	0.118751
12345	8	6619.1	80	8240.2	0.803274	0.601507

## Sheet: Exp2TemporalP_partial
		Gender correspondence										No gender correspondence
		MATCHING sentence – finder					MISATCHING sentence – finder					MATCHING sentence – finder					MISATCHING sentence – finder
kind of Co-presence	Participants' gender	absent	same age female	older female	same age male	older male	absent	same age female	older female	same age male	older male	absent	same age female	older female	same age male	older male	absent	same age female	older female	same age male	older male
Partial co-presence	M	1102.83	947.333	1036	1268.5	1239.33	1052.5	1309.5	1132.33	1261.42	1078.58	1201	1099	1013.42	1062.67	1266.67	1185.42	1227.5	1167.17	1114.5	1186.33
Partial co-presence	M	656.333	764.167	764.5	777.167	906.667	772.5	1229.33	998.417	889.667	853.667	885.417	612.917	741.667	751.167	774	768.667	739	1035.83	918.833	862.917
Partial co-presence	M	705.167	748.167	815.833	717.5	780.833	838.833	741.167	832.5	921.5	752.083	923	855.917	815.5	852.333	813.167	762.833	801.333	707.833	725.333	746
Partial co-presence	M	827.833	958.667	1119.5	1011.5	787.833	764.25	882	871.917	814.75	831.333	1120.5	984.167	1234.17	1038.33	989.833	868.667	868.917	845	1183.75	921.167
Partial co-presence	F	882.667	882.5	888.667	852.75	857.333	685.833	773	1037.83	973.667	885.5	624.667	895.333	818.833	771.667	891.833	980.5	647.667	840.167	791.75	761.333
Partial co-presence	F	1020.33	1017.5	1087.33	1073.83	1097.83	1205.17	1051.67	995.167	1135.33	997.667	1137.5	956.333	1184.83	957.667	1235.83	1186.83	1290.5	1220	1175.5	1132.17
Partial co-presence	F	894.167	834	814.333	761.333	812.833	981.5	751.833	793	833	826.667	746.667	619.167	791.333	949.167	802.5	1094.67	805.5	1036.83	643.5	970.667
Partial co-presence	F	1185.67	1392.5	1236.17	1246.83	1378	1300	1226.5	1239.33	1298.67	1221	1320.33	1321.67	1332.58	1207.17	1527.33	1319.5	1333	1426.17	1503	1485.83
Participants’ Gender X Gender Correspondence (Finder – Participant) X Temporal Priority
	m		f
	Gender correspondence	No gender correspondence	Gender correspondence	No gender correspondence
MATCHING sentence – finder	896.783	951.743	1010.83	1004.62
MISATCHING sentence – finder	941.412	931.85	1010.62	1082.26
Riass. tutti gli Effetti; dis.: (nuovo.sta)
1-VAR1, 2-GENDCNO, 3-MATCHMI, 4-AFF0M
	gdl	MS	gdl	MS
	Effetto	Effetto	Errore	Errore	F	p-level
1	1	373518	6	808400	0.46205	0.522016
2	1	30706.6	6	27684	1.10918	0.332813
3	1	26091.2	6	34085.5	0.76546	0.415269
4	4	8803.7	24	7886.1	1.11635	0.371953
12	1	1003.2	6	27684	0.03624	0.855303
13	1	6939.5	6	34085.5	0.20359	0.667686
23	1	443.8	6	4853.4	0.09143	0.772573
14	4	10742.2	24	7886.1	1.36216	0.276465
24	4	17558.5	24	7565	2.32103	0.085882
34	4	11804.9	24	13160.9	0.89697	0.481131
123	1	50671.6	6	4853.4	10.4404	0.017884
124	4	8873.9	24	7565	1.17302	0.347561
134	4	19809.4	24	13160.9	1.50516	0.232175
234	4	626.2	24	11834.8	0.05291	0.994409
1234	4	14259.5	24	11834.8	1.20488	0.334501

## Sheet: Exp2TemporalP_full
		Gender correspondence										No gender correspondence
		MATCHING sentence – finder					MISATCHING sentence – finder					MATCHING sentence – finder					MISATCHING sentence – finder
kind of Co-presence	Participants' gender	absent	same age female	older female	same age male	older male	absent	same age female	older female	same age male	older male	absent	same age female	older female	same age male	older male	absent	same age female	older female	same age male	older male
Full co-presence	M	676.833	698.833	843.5	778.083	748.167	671.5	919	601.833	842.167	659.667	743.167	757.833	698.5	709	706.167	743	734.833	648.167	691.5	533.167
Full co-presence	M	1084.33	1090.67	1122.67	959.667	942.333	1047.5	1050.33	1049.17	1138.67	976.167	1195.5	1122.83	1073.08	1073	1096.5	1160.5	990.167	1027	977.333	968.5
Full co-presence	M	1203.83	1064	1051	1012.42	984.667	1092.67	1157.67	1182.83	1170.17	1127	1111.33	1108.67	1200.17	1072.67	1135.17	1261.5	1079.5	1063.83	1062.33	1125.17
Full co-presence	M	561	658.333	620.167	613.75	604.5	657.5	707.667	631.333	643.667	598.833	664	683.167	645.667	674.667	617.583	595.167	619	618.667	617.833	618.333
Full co-presence	F	858.667	1050	891.667	768.5	854.5	862.833	993.167	1109.67	1037	1045.67	983	902.5	1025.83	1176.67	965.5	953	821.333	1085.17	1031.17	1108.83
Full co-presence	F	777.333	608.5	603.833	706.5	778.5	738.167	769.167	852.667	633.5	823.667	611.5	657.667	973.333	682	775.167	689.5	790.5	773.667	845.333	716.5
Full co-presence	F	1021.5	1049	871.167	1041.5	858.417	1013	945.5	1052.83	1009.75	1073.5	1057.92	1083.67	866.333	876.667	1004.83	1058.83	1291	920.833	944.583	929.167
Full co-presence	F	891.5	854	819.5	781.833	870.167	953.167	777.167	960.667	944.333	914.167	813.167	873.5	781.167	876.667	799.333	747.083	918.667	833.167	796	841.167
Gender correspondence (Finder - Participant) X Temporal priority			Participants’ gender X Temporal priority
	Gender corresp	No gender corresp		m	f
Match	856.884	896.878	Match	885.186	868.576
Mismatch	910.874	880.775	Mismatch	876.521	915.128
Riass. tutti gli Effetti; dis.: (nuovo.sta)
1-VAR1, 2-GENDCNO, 3-MATCHMI, 4-AFOFM
	gdl	MS	gdl	MS
	Effetto	Effetto	Errore	Errore	F	p-level
1	1	4838.35	6	718800	0.00673	0.937281
2	1	979.16	6	7491.5	0.1307	0.730094
3	1	14354.8	6	3230	4.44418	0.079579
4	4	4682.43	24	7493.3	0.62488	0.649292
12	1	1186.19	6	7491.5	0.15834	0.704462
13	1	30488.9	6	3230	9.4392	0.021877
23	1	49130.6	6	2403.7	20.4395	0.004013
14	4	7922.06	24	7493.3	1.05722	0.399033
24	4	431.32	24	8493	0.05079	0.994833
34	4	1375.87	24	3714.4	0.37042	0.827326
123	1	623.43	6	2403.7	0.25936	0.628742
124	4	9152.74	24	8493	1.07768	0.389475
134	4	8323.34	24	3714.4	2.24083	0.094598
234	4	6784.59	24	7374	0.92007	0.468499
1234	4	11990.6	24	7374	1.62606	0.200217

## Sheet: Exp3TemporalP&SpatialP
		Gender and Perspective based resonance between the first finder and participant										No gender and Perspective based resonance between the first finder and participant
		Relevant cue: matching sentence – First Finder					Relevant cue: matching sentence – Closer Character (mismatching sentence – First Finder)					Relevant cue: matching sentence – First Finder					Relevant cue: matching sentence – Closer Character (mismatching sentence – First Finder)
Participants’ Gender	kind of Co-presence	absent	same age female	older female	same age male	older male	absent	same age female	older female	same age male	older male	absent	same age female	older female	same age male	older male	absent	same age female	older female	same age male	older male
m	Partial co-presence	1268.67	1081.83	1224.8	1277	1104.83	1161.83	1124.5	1351.83	1290.83	1250.67	1187.6	1102	1159.83	1228.17	1214.17	1276	961.5	1244.5	1261.75	1382.17
m	Partial co-presence	1191.67	1062	1000	999.75	1405.75	1136.75	831.667	967	1207.17	1119.2	1004.25	1046.2	1016.67	1186	1159.67	1126.4	1076.8	1272	958	1219
m	Partial co-presence	1129.67	940	1008.8	1016.25		1098.33	895.833	873.167	1031.83	1295.6	978	900.333	1170.33	986.5	1204.2	968.2	1079.6	1042.25	978.8	1057.33
m	Partial co-presence	1055.6	1010.4	1322.25	964.833	1135	1169.5	964.5	1146	1136.5	1215	1285	1151.2	1128.67	1029.2	1032	1136	1222.2	1007.17	982.5	1108.17
f	Partial co-presence	1397.67	1581.5	1372	1526.75	1243.5	1173.4	1049	1220.5	978.5	1223	1413.2	1282.8	1253.4	1054	1178.4	1291.2	1318.25	1237.4	1013	1204.33
f	Partial co-presence	1175.67	1254	1013.83	1026.2	977.833	1113.5	1115.33	1035.5	1190.17	1161	1215.83	1229.5	1220.17	972	1109.17	1096.75	1181	1175	1114.67	1197.5
f	Partial co-presence	873.25	700.333	741.25	874.5	752	673	725	781	875.5	755.833	731.333	699.833	717.833	573.2	642.833	656.5	707.8	597.333	787.833	621.667
f	Partial co-presence	1183.67	1508	1259.5	1201.33	1373.67	1232.67	1450.6	1368.2	1299.67	1436.5	1276	1297.5	1218	1333.6	1244.83	1239.33	1272	1464.33	1277.2	1312.5
m	Full co-presence	726.6	762	801.6	746	753	788	839.8	671.4	664.333	664	830.167	675	664.6	821.75	707	769.333	712.833	744.5	710.5	931.25
m	Full co-presence	805.667	930.667	854.6	852.167	922	793.5	1098.33	805.833	1029.5	900.8	866	876.8	1051.2	866.8	869	900	1031.33	946.667	835.667	935.667
m	Full co-presence	791	978.4	947.6	961.833	842	957.25	958.667	741.2	859.6	927.5	1204.83	880	814.5	947.6	838.167	951.833	1013.2	997.667	789.833	983.833
m	Full co-presence	926.5	1237.83	1118.67	1055.4	1006.4	1458.2	1132.2	1027	1024.25	888.5	866	845.25	1122.4	986.75	955.667	1351.75	1122.25	1039.5	997.833	1011.4
f	Full co-presence	1142.17	1342	1176.33	1114.33	1251	1093	1193.67	1196.33	1227.67	1184	1286.4	1242.83	1152.83	1393.33	1218.8	1339	1347.83	1193.2	1320.5	995
f	Full co-presence	1342	1142.17	1313.6	1236.6	1230	974.4	1146.67	1400.17	1248	1464.67	1314.83	1246.17	1306.67	1189.5	1257	1320	1288.5	1078.5	1294	1256.33
f	Full co-presence	1038.6	1082.8	869.333	882.5	895.167	936.2	1019.83	934.5	1099.67	1032.2	949.667	992.4	1089.75	891	772.333	1024.17	969.167	1084.5	893.333	1075.33
f	Full co-presence	1036	1001.67	999.333	1089.5	1060.5	1122.17	1022.75	949.4	1064	870.5	942.667	1017.5	886.5	800.25	921.75	963.4	1434	947.833	992.833	976.167
Participants’ Gender, Bystander, Gender-Perspective based resonance and Relevant Cue
	m				f
	Gender and Perspective based resonance between the first finder and participant		No gender and Perspective based resonance between the first finder and participant		Gender and Perspective based resonance between the first finder and participant		No gender and Perspective based resonance between the first finder and participant
	matching sentence – First Finder	matching sentence – Closer Character (mismatching sentence – First Finder)	matching sentence – First Finder	matching sentence – Closer Character (mismatching sentence – First Finder)	matching sentence – First Finder	matching sentence – Closer Character (mismatching sentence – First Finder)	matching sentence – First Finder	matching sentence – Closer Character (mismatching sentence – First Finder)
absent	992.211	1077.63	1050.35	1086.35	1148.63	1039.79	1141.24	1116.29
same age female	1014.32	990.403	959.531	1028.37	1201.56	1090.36	1126.07	1189.82
older female	1056.48	983.15	1007.45	1053.32	1093.15	1110.7	1105.64	1097.26
same age male	992.188	1052.96	1026.76	950.437	1118.96	1122.9	1025.86	1086.67
older male	1048.02	1020.08	988.87	1100.99	1097.96	1140.96	1043.14	1079.85
Riass. tutti gli Effetti; dis.: (nuovo.sta)
1-VAR1, 2-NUOVA2, 3-GENDRNO, 4-MATCHMI, 5-AFFOM
	gdl	MS	gdl	MS
	Effetto	Effetto	Errore	Errore	F	p-level
1	1	531621	11	592978	0.896528	0.364051
2	1	897488	11	592978	1.51353	0.244263
3	1	3031	11	9803.8	0.309207	0.589299
4	1	5975	11	17770	0.336267	0.573678
5	4	10170	44	10830.3	0.93904	0.450332
12	1	1060566	11	592978	1.78854	0.2081
13	1	5856	11	9803.8	0.597267	0.455908
23	1	10845	11	9803.8	1.10615	0.315476
14	1	10205	11	17770	0.574271	0.464492
24	1	23702	11	17770	1.33383	0.272597
34	1	37219	11	12750.7	2.91895	0.115572
15	4	24356	44	10830.3	2.24891	0.079056
25	4	22331	44	10830.3	2.06187	0.102118
35	4	14642	44	12695.9	1.15333	0.34434
45	4	5378	44	12534.8	0.429012	0.786873
123	1	6254	11	9803.8	0.637912	0.441372
124	1	2870	11	17770	0.161536	0.695445
134	1	2570	11	12750.7	0.201568	0.662175
234	1	54	11	12750.7	0.004263	0.949111
125	4	20785	44	10830.3	1.91914	0.12409
135	4	4278	44	12695.9	0.336978	0.851557
235	4	3595	44	12695.9	0.283168	0.887324
145	4	16249	44	12534.8	1.29634	0.286169
245	4	20370	44	12534.8	1.62509	0.184877
345	4	15130	44	8645.4	1.75008	0.156153
1234	1	1514	11	12750.7	0.118702	0.736943
1235	4	24483	44	12695.9	1.92844	0.122526
1245	4	5241	44	12534.8	0.418122	0.794663
1345	4	23505	44	8645.4	2.71879	0.041577
2345	4	672	44	8645.4	0.077705	0.988712
12345	4	11007	44	8645.4	1.27319	0.294947

## Sheet: Exp4TemporalP&Touch
		Gender correspondence Finder - Participant										No gender correspondence Finder - Participant (> gender correspondance Touching Character - Participant)
		MATCHING sentence – First Finder					MISATCHING sentence – First Finder (> MATCHING sentence – Touching Character)					MATCHING sentence – First Finder					MISATCHING sentence – First Finder (> MATCHING sentence – Touching Character)
Participants’ Gender	kind of Co-presence	absent	same age female	older female	same age male	older male	absent	same age female	older female	same age male	older male	absent	same age female	older female	same age male	older male	absent	same age female	older female	same age male	older male
m	Partial co-presence	1146.25	1133.33	1153	932.75	989.8	943.4	1307	1183.17	1379.25	1018	1177.17	1131.5	1320.5	1028.33	1044.6	1379		945	1281.8	1243.2
m	Partial co-presence	1215.5	1166.4	1182.67	1267.33	1008	1214	1150.6	1361.33	1409.4	1232.8	1206.5	1346.8	1448	1202.6	1144	1169.33	1231.2	1278.8	1148.4	1111.75
m	Partial co-presence	1111.4	1046.83	1023.4	994.333	1201.5	1208.83	1024.5	1286.4	993.4	1054.6	1045.6	1076.6	1097	1179.4	1069.4	969	1062.67		1040.5	1231
f	Partial co-presence	1155.6	922.2	1199.5	888.167	1055	1048.33	967.667	1111.2	1073.8	1114.2	1107.5	899.6	981.167	917	1280.25	949.333	965	911	1019.5	1074
f	Partial co-presence	729	838	1024.33	948.5	892	839.167	738.833	717.333	871.667	720.833	894.833	848.667	869.333	766.4	999.5	734.167	837.5	689	706.833	699.333
f	Partial co-presence	686.667	1034.67	648.333	637	747.5	649	769.833	610.167	703.167	881	776.833	614.5	752.667	794	723.5	652.8	670.5	774.5	767.167	774.833
f	Partial co-presence	1058.25	1217	1266	1014.67	996.75	942.5	920.8	1000.6	990.75	1048		1072.5	1289.5	925.667	1221	1104.67	1124.5	934	1037.5	1009.67
m	Full co-presence	889.167	931	1190.17	1015.5	1230	1168.83	954	961.333	1158.75	997.5	954.5	968	1057.17	1166	1070.2	1085.67	954.667	1037.83	981.333	1165
m	Full co-presence	785.5	1016.5	827.25	991.75	874.667	973	897.667	841.2	931	847.4	790.25	765.333	903.667	906.333	987.5	837.6	804	961	829.667	1126.2
m	Full co-presence	1299.83	1208.67	1183.8	1159.33	1187.6	1061.5	1318.67	1168.83	1320.67	1250.33	1106.17	1260.83	1002.4	1061.67	1189.33	1226	1106.8	851.5	1201.6	993.6
m	Full co-presence	1206.25	1199.8	1289.2	1139	1203.4	1291	986	1035.83	1038.17	1161.17	1351	1191.67	1244.8	1302	1131.4	1127.67	1168.25	1245.4	1292	1157
f	Full co-presence	888.2	1112.83	921.333	985.8	1104	1093	1191.33	944.833	934	981.75	889.167	998	1024	1144.6	959.667	851	912.2	1108	1074.4	1016.8
f	Full co-presence	967.6	959.8	995.4	1004.67	1102.67	1011.17	1012.67	978.75	825	911.2	890.833	819	988.4	968.833	1133	925	891.4	1009	923	1120.17
f	Full co-presence	1258.5	1119.83	1109.83	1234.4	1061.83	1207.6	1019.5	1087.83	1009.5	1310.4	1243.67	1214.4	1023	1171.5	1178.33	1258.67	1194.83	1251.17	1357.5	1119.33
f	Full co-presence	1176.4	1049.2	981.167	1133.17	1148	926	1119.67	987.667	943.167	1048.83	919	1097.67	1004.83	954	1213.67	1004	1037.67	971.833	1076.83	872
Participants’ Gender		Gender X Gender correspondence X Relevant cue					Co-presence X Gender correspondence X Relevant cue
male	1148.35		m		f			Partial co-presence		PartialFull
female	953.546		Gender correspondence Finder - Participant	No gender correspondence Finder - Participant (> gender correspondance Touching Character - Participant)	Gender correspondence Finder - Participant	No gender correspondence Finder - Participant (> gender correspondance Touching Character - Participant)		Gender correspondence Finder - Participant	No gender correspondence Finder - Participant (> gender correspondance Touching Character - Participant)	Gender correspondence Finder - Participant	No gender correspondence Finder - Participant (> gender correspondance Touching Character - Participant)
		MATCHING sentence – First Finder	1129.7	1170.05	979.748	961.748	MATCHING sentence – First Finder	1030.87	1075.65	1078.58	1056.14
		MISATCHING sentence – First Finder (> MATCHING sentence – Touching Character)	1170.88	1122.77	940.803	931.885	MISATCHING sentence – First Finder (> MATCHING sentence – Touching Character)	1064.02	1001.46	1047.67	1053.19
Riass. tutti gli Effetti; dis.: (nuovo.sta)
1-VAR1, 2-NUOVA2, 3-GENDCNO, 4-MATCHMI, 5-AFOFM
	gdl	MS	gdl	MS
	Effetto	Effetto	Errore	Errore	F	p-level
1	1	1655925	8	307932	5.37756	0.048999
2	1	11023	8	307932	0.0358	0.854649
3	1	3282	8	14268.4	0.23001	0.644354
4	1	15300	8	11054.2	1.3841	0.273223
5	4	4137	32	11105	0.3725	0.826464
12	1	1242407	8	307932	4.03468	0.079444
13	1	1000	8	14268.4	0.07008	0.797913
23	1	2	8	14268.4	0.00015	0.990683
14	1	10726	8	11054.2	0.97034	0.353446
24	1	140	8	11054.2	0.0127	0.913043
34	1	17185	8	3777.4	4.5494	0.065493
15	4	22178	32	11105	1.99711	0.118663
25	4	16327	32	11105	1.47024	0.234281
35	4	3627	32	13426.1	0.27013	0.89502
45	4	2667	32	7722.5	0.34529	0.845294
123	1	6324	8	14268.4	0.4432	0.52431
124	1	12347	8	11054.2	1.11698	0.321437
134	1	25950	8	3777.4	6.86974	0.030602
234	1	49915	8	3777.4	13.2139	0.006636
125	4	18677	32	11105	1.68182	0.178461
135	4	13379	32	13426.1	0.9965	0.423736
235	4	13033	32	13426.1	0.97073	0.437097
145	4	6349	32	7722.5	0.82212	0.520773
245	4	8250	32	7722.5	1.06837	0.388258
345	4	2938	32	10314.2	0.28482	0.88564
1234	1	10637	8	3777.4	2.81584	0.131857
1235	4	11015	32	13426.1	0.82044	0.521785
1245	4	6375	32	7722.5	0.82545	0.518775
1345	4	6198	32	10314.2	0.60091	0.664699
2345	4	7288	32	10314.2	0.70665	0.593316
12345	4	10456	32	10314.2	1.01376	0.414973
